# Supplementary material for: Pt modulation of NbSe2 for enhanced activity and stability: a new Pt3Nb2Se8 compound for highly-efficient alkaline hydrogen evolution
Source: Royal Society of Chemistry journal article supplement (doi:10.1039/d2cc01765b), 2022-01-01
Supplement: d2cc01765b1.pdf [file d2cc01765b1.pdf]

## Supporting Information:

### **Pt modulation NbSe<sub>2</sub> with enhanced activity and stability: A new Pt<sub>3</sub>Nb<sub>2</sub>Se<sub>8</sub> compound for highly-efficient alkaline hydrogen evolution**

Mengjia Luo,<sup>†ab</sup> Tong Wu,<sup>†ab</sup> Shumao Xu,<sup>a</sup> Ruiqi Wang,<sup>c</sup> and Fuqiang Huang<sup>\*abcd</sup>

---

<sup>a</sup> State Key Laboratory of High Performance Ceramics and Superfine Microstructure, Shanghai Institute of Ceramics, Chinese Academy of Sciences, Shanghai 200050, P.R. China;

<sup>b</sup> Center of Materials Science and Optoelectronics Engineering, University of Chinese Academy of Sciences, Beijing 100049, China;

<sup>c</sup> State Key Laboratory of Rare Earth Materials Chemistry and Applications, College of Chemistry and Molecular Engineering, Peking University, Beijing 100871, P.R. China

<sup>d</sup> CAS Centre for Excellence in Superconducting Electronic (CENSE), Shanghai 200050, China

† These† These authors contributed equally: Mengjia Luo and Tong Wu

**List of contents:**

- 1. Experimental section.**
- 2. Supplementary figures.**
- 3. Supplementary tables.**

## 1. Experimental section.

**Reagents.** The following reagents were used: Nb (99.9%, Alfa Aesar), Pt (99.99%, ZhongNuo Advance Material (Beijing) Technology Co.), Se (99.9%, Sinopharm Chemical ReagentCo., Ltd). NaSe powder was produced by a liquid ammonia method.

**Synthesis of  $\text{Pt}_3\text{Nb}_2\text{Se}_8$  Single Crystals.** Single crystals of  $\text{Pt}_3\text{Nb}_2\text{Se}_8$  were synthesized by the solid-state reaction. A mixture of 1 mmol NaSe powder, 1 mmol Pt powder, 1 mmol Nb powder and 1 mmol Se powder was ground and loaded into carbon-coated fused silica tubes under an Ar atmosphere in a glovebox, which was flame-sealed under vacuum ( $10^{-3}$  mbar). The tubes were heated to 1323 K in 6 h and kept at the temperature for 25 h, then cooled to room temperature by turning off the furnace. Black fiber-shaped crystals were obtained by breaking the tubes.

**Synthesis of  $\text{Pt}_3\text{Nb}_2\text{Se}_8$  Powder.** Powder of  $\text{Pt}_3\text{Nb}_2\text{Se}_8$  was synthesized by solid-state reaction of stoichiometric amount of Pt, Nb and Se powders in a sealed carbon-coated fused-silica tube evacuated to  $10^{-3}$  mbar. The tubes were heated to 1123 K in 6 h and kept at this temperature for 2 days. Then the furnace was turned off and the tube was cooled to room temperature.

**Single-Crystal X-ray Crystallography.** Suitable crystal was chosen to perform the data collections. Single crystal X-ray diffraction was performed on a Bruker D8QUEST diffractometer equipped with Mo  $K\alpha$  radiation. The diffraction data were collected at room temperature by the  $\omega$ - and  $\varphi$ - scan methods. The crystal structure was solved and refined using APEX3 program. Absorption corrections were performed with the multi-scan method (ASDABS).<sup>1</sup>

**Characterization.** The single crystals of  $\text{Pt}_3\text{Nb}_2\text{Se}_8$  were investigated with a JEOL (JSM6510) scanning electron microscope equipped with energy dispersive X-ray spectroscopy (EDXS, Oxford Instruments). Powder X-ray diffraction of the samples were collected on a Bruker D8QUEST diffractometer equipped with mirror-monochromated Cu  $K\alpha$  radiation ( $\lambda = 0.15406$  nm). The patterns were recorded in a

slow-scanning mode with  $2\theta$  from  $10^\circ$  to  $80^\circ$  at a scan rate of  $6^\circ/\text{min}$ . Simulated patterns were generated by using the MERCURY program and CIF file of the refined single crystal structure. The morphology and elemental composition of powder sample were investigated with a JEM-2100F transmission electron microscope. Temperature variation of the resistance was measured using the standard four-probe technique with the Resistivity model and collected on a Physical Properties Measurement System (PPMS, Quantum Design). X-ray Photoelectron Spectroscopy (XPS) measurements were run on a Thermo-escalab 250Xi instrument.

**Electrocatalytic measurement.** The electrochemical experiments were carried out in a three-electrode cell with a CHI760E electrochemical workstation. The ink was prepared by dispersing 2 mg of the catalyst and 3 mg of acetylene black and 100  $\mu\text{L}$  of 5 wt% Nafion solution in ethanol (900  $\mu\text{L}$ ) by sonication to form a homogeneous dispersion. Then, 100  $\mu\text{L}$  of the dispersion was drop-casted onto a nickel foam (NF), leading to a catalyst loading of 2.5  $\text{mg cm}^{-2}$ . During the electrochemical measurements, carbon rod and Hg/HgO electrode were used as the counter and reference electrodes, respectively. The KOH electrolyte was bubbled with  $\text{N}_2$  for 0.5 h before HER test. The pH of 1 M KOH was measured by pH tester (Shanghai INESA). Polarization curves were recorded by linear sweep voltammetry (LSV) at a scan rate of  $5 \text{ mV s}^{-1}$  in the range of 0 to  $-0.6 \text{ V}$  versus RHE. To estimate the electrochemically active surface area (ECSA) of the catalyst, cyclic voltammogram (CV) was tested by measuring double-layer capacitance ( $C_{dl}$ ) between 0 to  $-0.1 \text{ V}$  at  $50\text{-}250 \text{ mV s}^{-1}$  for HER. The Nyquist plots were measured with frequencies ranging from 100 kHz to 1 Hz at the  $\eta$  of 100 mV for HER, and the amplitude of 5 mV at a certain potential.

**Electronic Structure Calculation.** The electronic structures of  $\text{Pt}_3\text{Nb}_2\text{Se}_8$  were calculated under first principle using the Projected Augmented Wave Method (PAW)<sup>2</sup> within the density functional theory (DFT) as implemented in the Vienna Ab Initio Simulation Package (VASP).<sup>3-5</sup> Generalized gradient approximation (GGA) and parameterized by Perdew-Burke-Ernzerhof (PBE)<sup>6</sup> version were used to describe the exchange correlation functional. The cutoff energy of plane wave basis was set to 320

eV. A Monkhorst-Pack k-point grid of  $3 \times 2 \times 8$  was used for Brillouin zone (BZ) sampling. The lattice parameters were fixed as the diffraction data during structural optimization, while the positions of atoms could relax until the atomic forces on each atom reduce less than  $0.01 \text{ eV/\AA}$ . High-symmetry points in Brillouin zones ( $\Gamma$ , X, S, Y, Z, U, and R represent  $(0, 0, 0)$ ,  $(0.5, 0, 0)$ ,  $(0.5, 0.5, 0)$ ,  $(0, 0.5, 0)$ ,  $(0, 0, 0.5)$ ,  $(0.5, 0, 0.5)$ , and  $(0.5, 0.5, 0.5)$ ) were considered in our band structure calculation.

## 2. Supplementary figures.

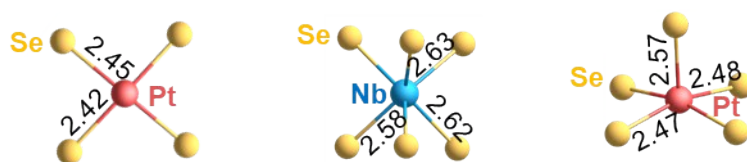

**Fig. S1.** The coordination environment of Pt and Nb.

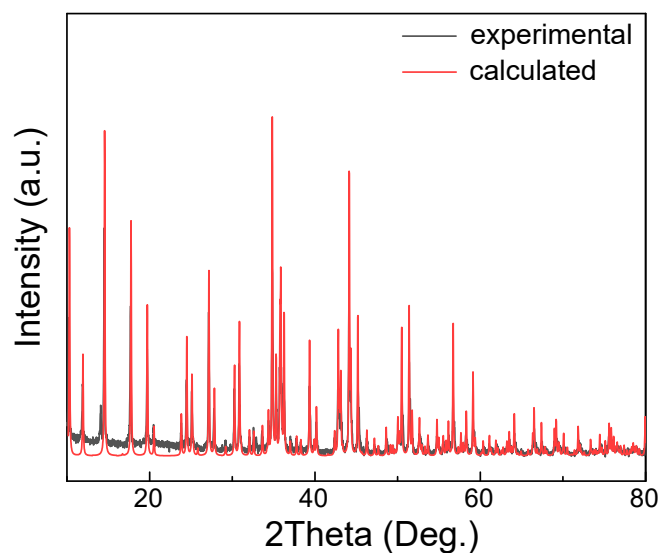

**Fig. S2.** The PXR D patterns of  $\text{Pt}_3\text{Nb}_2\text{Se}_8$ . The simulated patterns were generated (red line) based on the CIF files.

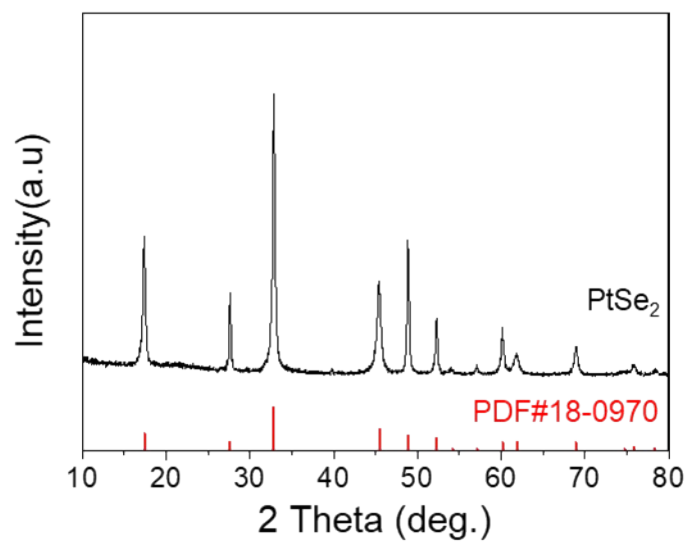

Fig. S3. The XRD patterns (black line) and PDF card (red line) of PtSe<sub>2</sub>.

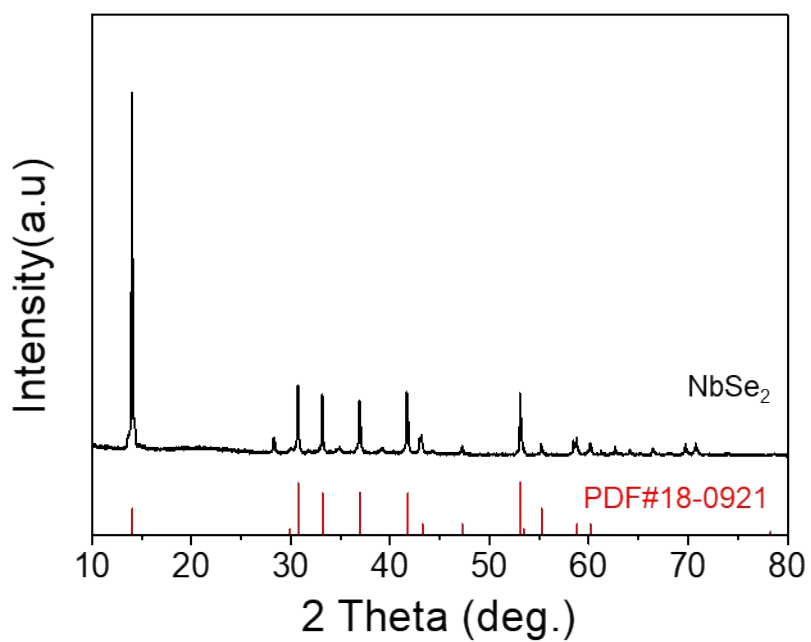

Fig. S4. The XRD patterns (black line) and PDF card (red line) of NbSe<sub>2</sub>.

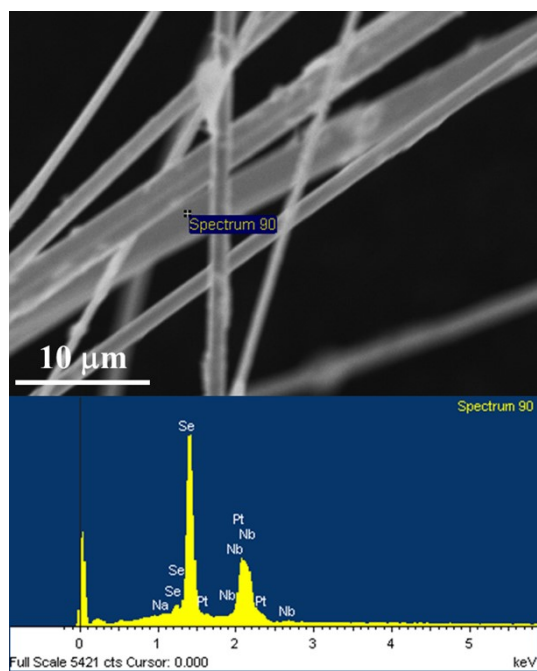

**Fig. S5.** The SEM image and EDX result of  $\text{Pt}_3\text{Nb}_2\text{Se}_8$  crystal.

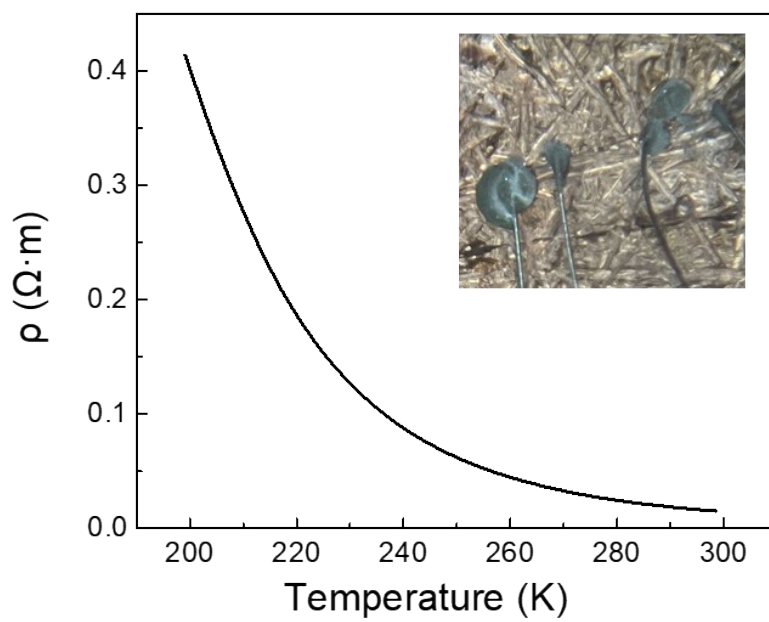

**Fig. S6.** Temperature dependence of electrical resistivity for  $\text{Pt}_3\text{Nb}_2\text{Se}_8$ .

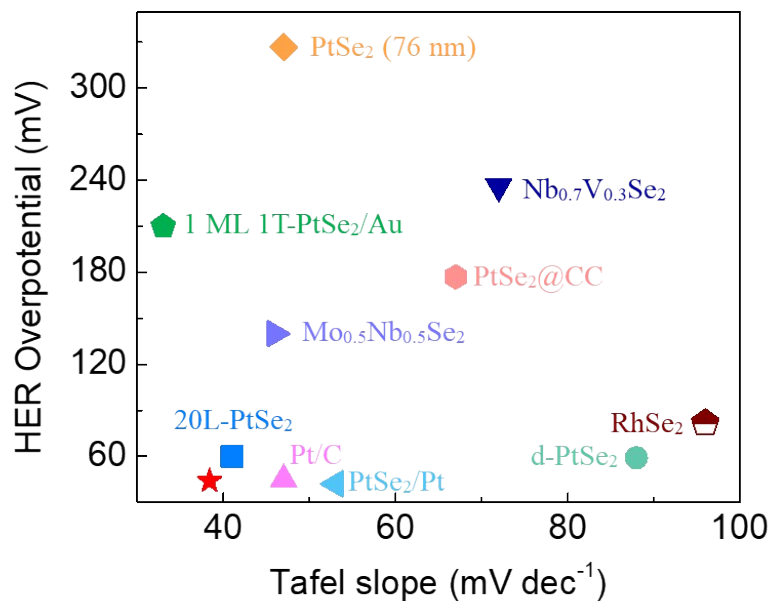

**Fig. S7.** Comparison of HER overpotential values and Tafel slope of  $\text{Pt}_3\text{Nb}_2\text{Se}_8$ , different  $\text{NbSe}_2$ ,  $\text{PtSe}_2$  or noble metal based electrocatalysts.

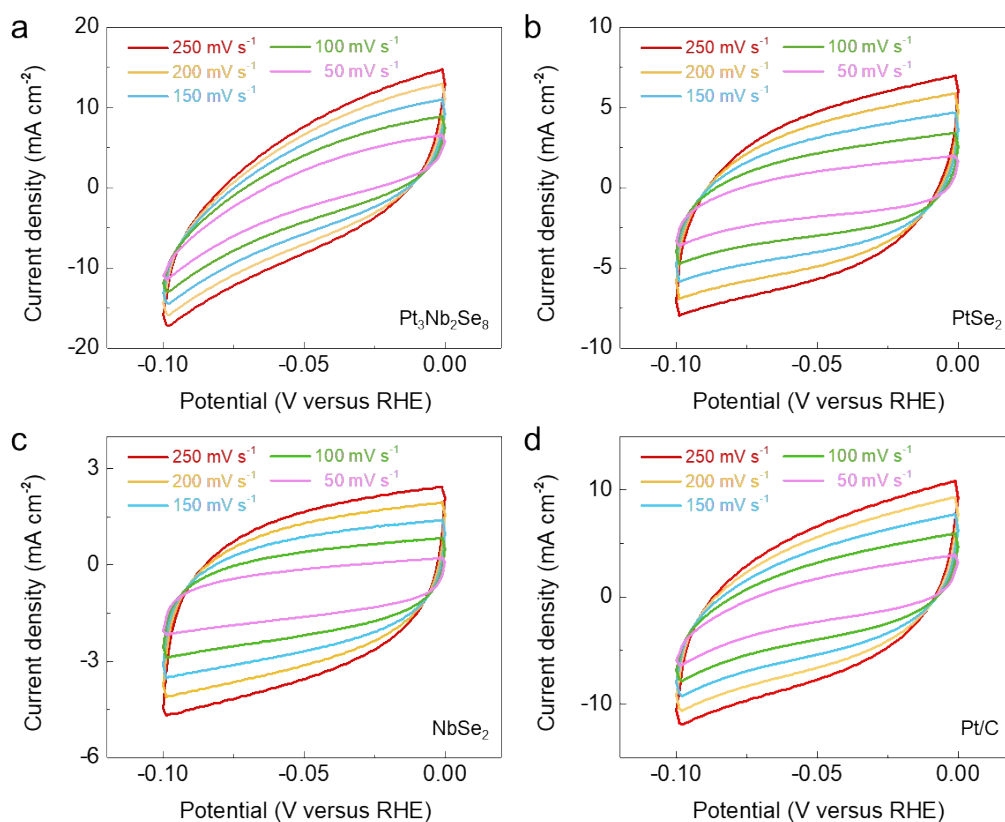

**Fig. S8.** Cyclic voltammetry (CV) curves of commercial  $\text{Pt}_3\text{Nb}_2\text{Se}_8$ ,  $\text{PtSe}_2$ ,  $\text{NbSe}_2$ , and  $\text{Pt/C}$  measured at  $-0.10$ - $0.00$  V vs. RHE with different scan rates from  $50$  to  $250$   $\text{mV/s}$ .



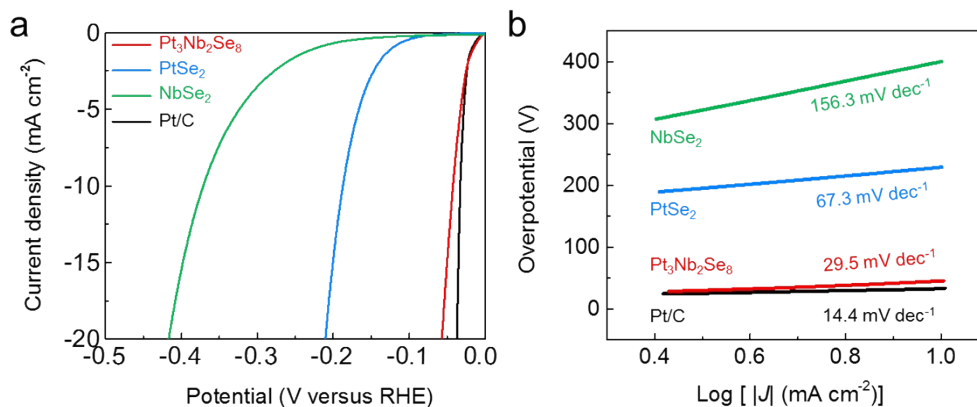

**Fig. S9.** HER performance in 0.5 M H<sub>2</sub>SO<sub>4</sub>. (a) Linear sweep voltammetry (LSV) curves and (b) corresponding Tafel plots of the Pt<sub>3</sub>Nb<sub>2</sub>Se<sub>8</sub>, PtSe<sub>2</sub>, NbSe<sub>2</sub>, and commercial Pt/C.

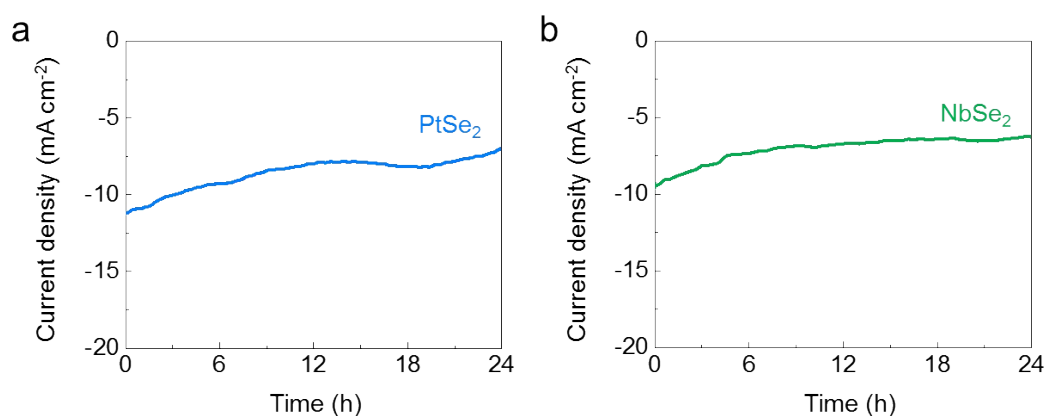

**Fig. S10.** The chronoamperometric test of (a) PtSe<sub>2</sub> and (b) NbSe<sub>2</sub> for 24 h at 10 mA cm<sup>-2</sup>.

### 3. Supplementary tables.

**Table S1.** Crystal Data and details of the structure refinements for Pt<sub>3</sub>Nb<sub>2</sub>Se<sub>8</sub>.

| Chemical formula             | Pt <sub>3</sub> Nb <sub>2</sub> Se <sub>8</sub> |
|------------------------------|-------------------------------------------------|
| $F_w$ (g·mol <sup>-1</sup> ) | 467.59                                          |
| Crystal system               | orthorhombic                                    |
| Space group                  | <i>Pbam</i> (No. 55)                            |
| $a$ (Å)                      | 10.694(4)                                       |
| $b$ (Å)                      | 15.017(6)                                       |
| $c$ (Å)                      | 3.5633(15)                                      |

|                                                             |             |
|-------------------------------------------------------------|-------------|
| $V$ (Å <sup>3</sup> )                                       | 572.24(40)  |
| $Z$                                                         | 2           |
| Crystal color                                               | Black       |
| $\rho_c$ (g·cm <sup>-3</sup> )                              | 8.142       |
| $\mu$ (mm <sup>-1</sup> )                                   | 63.87       |
| $F(000)$                                                    | 591         |
| $\Delta\rho_{\max}, \Delta\rho_{\min}$ (e Å <sup>-3</sup> ) | 1.57, -2.24 |
| $R_1 [I > 2\sigma(I)]$                                      | 0.027       |
| $wR_2$ (all data)                                           | 0.039       |
| GOF                                                         | 1.07        |

---

<sup>a</sup> $R_1 = \sum ||F_o| - |F_c|| / \sum |F_o|$ . <sup>b</sup> $wR_2 = \{\sum [w(F_o^2 - F_c^2)^2] / \sum [w(F_o^2)^2]\}^{1/2}$ ,  $w = 1 / [\sigma^2(F_o^2) + (0.1000P)^2]$ , where  $P = (F_o^2 + 2F_c^2) / 3$ .

**Table S2.** Atomic coordinates and isotropic displacement parameters ( $\text{\AA}^2$ ) of the  $\text{Pt}_3\text{Nb}_2\text{Se}_8$  compound refined from single X-ray diffraction data recorded at room temperature.

| atom | site | occ | x            | y            | z   | $U_{\text{iso}}^*/U_{\text{eq}}$ |
|------|------|-----|--------------|--------------|-----|----------------------------------|
| Pt01 | 4h   | 1   | 0.62679 (5)  | 0.21815 (4)  | 0.5 | 0.00661 (17)                     |
| Pt02 | 2b   | 1   | 0.5          | 0.5          | 0.5 | 0.0103 (2)                       |
| Nb03 | 4g   | 1   | 0.78940 (12) | 0.11875 (9)  | 0   | 0.0065 (3)                       |
| Se04 | 4h   | 1   | 0.72878 (14) | 0.49036 (9)  | 0.5 | 0.0088 (4)                       |
| Se05 | 4h   | 1   | 0.46025 (13) | 0.34106 (10) | 0.5 | 0.0071 (4)                       |
| Se06 | 4g   | 1   | 0.75254 (13) | 0.28841 (10) | 0   | 0.0081 (4)                       |
| Se07 | 4g   | 1   | 0.54778 (14) | 0.11833 (10) | 0   | 0.0079 (4)                       |

**Table S3.** Atomic displacement parameters ( $\text{\AA}^2$ ) of  $\text{Pt}_3\text{Nb}_2\text{Se}_8$ .

| atom | $U^{11}$   | $U^{22}$   | $U^{33}$    | $U^{12}$    | $U^{13}$ | $U^{23}$ |
|------|------------|------------|-------------|-------------|----------|----------|
| Pt01 | 0.0077 (3) | 0.0076 (3) | 0.0046 (4)  | 0.0006 (3)  | 0        | 0        |
| Pt02 | 0.0092 (5) | 0.0071 (5) | 0.0145 (6)  | -0.0007 (4) | 0        | 0        |
| Nb03 | 0.0065 (7) | 0.0071 (7) | 0.0060 (9)  | 0.0021 (6)  | 0        | 0        |
| Se04 | 0.0113 (9) | 0.0075 (8) | 0.0076 (11) | 0.0005 (7)  | 0        | 0        |
| Se05 | 0.0092 (8) | 0.0078 (8) | 0.0044 (9)  | 0.0003 (6)  | 0        | 0        |
| Se06 | 0.0106 (8) | 0.0079 (8) | 0.0057 (10) | -0.0013 (7) | 0        | 0        |
| Se07 | 0.0085 (8) | 0.0106 (8) | 0.0046 (10) | -0.0011 (7) | 0        | 0        |

**Table S4.** Detailed bond lengths and angles (Å, °) of Pt<sub>3</sub>Nb<sub>2</sub>Se<sub>8</sub>.

|                                             |             |                                               |             |
|---------------------------------------------|-------------|-----------------------------------------------|-------------|
| Pt01—Se06                                   | 2.4690 (12) | Pt02—Se04 <sup>ii</sup>                       | 2.4508 (18) |
| Pt01—Se06 <sup>i</sup>                      | 2.4691 (12) | Pt02—Se04                                     | 2.4508 (18) |
| Pt01—Se07 <sup>i</sup>                      | 2.4769 (12) | Nb03—Se06                                     | 2.578 (2)   |
| Pt01—Se07                                   | 2.4769 (12) | Nb03—Se07                                     | 2.584 (2)   |
| Pt01—Se05                                   | 2.5648 (17) | Nb03—Se05 <sup>iii</sup>                      | 2.6224 (16) |
| Pt01—Nb03 <sup>i</sup>                      | 2.9028 (13) | Nb03—Se05 <sup>iv</sup>                       | 2.6224 (16) |
| Pt01—Nb03                                   | 2.9028 (13) | Nb03—Se04 <sup>v</sup>                        | 2.6323 (16) |
| Pt02—Se05 <sup>ii</sup>                     | 2.4243 (17) | Nb03—Se04 <sup>vi</sup>                       | 2.6323 (16) |
| Pt02—Se05                                   | 2.4244 (17) |                                               |             |
| Se06—Pt01—Se06 <sup>i</sup>                 | 92.37 (6)   | Se05 <sup>iii</sup> —Nb03—Se04 <sup>v</sup>   | 132.83 (7)  |
| Se06—Pt01—Se07 <sup>i</sup>                 | 164.46 (5)  | Se05 <sup>iv</sup> —Nb03—Se04 <sup>v</sup>    | 76.12 (5)   |
| Se06 <sup>i</sup> —Pt01—Se07 <sup>i</sup>   | 85.72 (5)   | Se06—Nb03—Se04 <sup>vi</sup>                  | 135.44 (4)  |
| Se06—Pt01—Se07                              | 85.72 (4)   | Se07—Nb03—Se04 <sup>vi</sup>                  | 85.66 (5)   |
| Se06 <sup>i</sup> —Pt01—Se07                | 164.46 (5)  | Se05 <sup>iii</sup> —Nb03—Se04 <sup>vi</sup>  | 76.12 (5)   |
| Se07 <sup>i</sup> —Pt01—Se07                | 92.00 (6)   | Se05 <sup>iv</sup> —Nb03—Se04 <sup>vi</sup>   | 132.83 (7)  |
| Se06—Pt01—Se05                              | 94.05 (5)   | Se04 <sup>v</sup> —Nb03—Se04 <sup>vi</sup>    | 85.20 (7)   |
| Se06 <sup>i</sup> —Pt01—Se05                | 94.05 (5)   | Se06—Nb03—Pt01                                | 53.15 (3)   |
| Se07 <sup>i</sup> —Pt01—Se05                | 101.46 (5)  | Se07—Nb03—Pt01                                | 53.29 (3)   |
| Se07—Pt01—Se05                              | 101.46 (5)  | Se05 <sup>iii</sup> —Nb03—Pt01                | 83.22 (4)   |
| Se06—Pt01—Nb03 <sup>i</sup>                 | 109.65 (5)  | Se05 <sup>iv</sup> —Nb03—Pt01                 | 135.73 (6)  |
| Se06 <sup>i</sup> —Pt01—Nb03 <sup>i</sup>   | 56.67 (5)   | Se04 <sup>v</sup> —Nb03—Pt01                  | 138.40 (6)  |
| Se07 <sup>i</sup> —Pt01—Nb03 <sup>i</sup>   | 56.75 (5)   | Se04 <sup>vi</sup> —Nb03—Pt01                 | 85.24 (4)   |
| Se07—Pt01—Nb03 <sup>i</sup>                 | 109.55 (5)  | Se06—Nb03—Pt01 <sup>vii</sup>                 | 53.15 (3)   |
| Se05—Pt01—Nb03 <sup>i</sup>                 | 141.81 (2)  | Se07—Nb03—Pt01 <sup>vii</sup>                 | 53.29 (3)   |
| Se06—Pt01—Nb03                              | 56.67 (5)   | Se05 <sup>iii</sup> —Nb03—Pt01 <sup>vii</sup> | 135.73 (6)  |
| Se06 <sup>i</sup> —Pt01—Nb03                | 109.65 (5)  | Se05 <sup>iv</sup> —Nb03—Pt01 <sup>vii</sup>  | 83.23 (4)   |
| Se07 <sup>i</sup> —Pt01—Nb03                | 109.55 (5)  | Se04 <sup>v</sup> —Nb03—Pt01 <sup>vii</sup>   | 85.24 (4)   |
| Se07—Pt01—Nb03                              | 56.75 (5)   | Se04 <sup>vi</sup> —Nb03—Pt01 <sup>vii</sup>  | 138.40 (6)  |
| Se05—Pt01—Nb03                              | 141.81 (2)  | Pt01—Nb03—Pt01 <sup>vii</sup>                 | 75.72 (4)   |
| Nb03 <sup>i</sup> —Pt01—Nb03                | 75.73 (4)   | Pt02—Se04—Nb03 <sup>viii</sup>                | 83.28 (5)   |
| Se05 <sup>ii</sup> —Pt02—Se05               | 180.0       | Pt02—Se04—Nb03 <sup>ix</sup>                  | 83.28 (5)   |
| Se05 <sup>ii</sup> —Pt02—Se04 <sup>ii</sup> | 96.71 (5)   | Nb03 <sup>viii</sup> —Se04—Nb03 <sup>ix</sup> | 85.19 (7)   |
| Se05—Pt02—Se04 <sup>ii</sup>                | 83.29 (5)   | Pt02—Se05—Pt01                                | 125.92 (6)  |

|                                              |            |                                            |            |
|----------------------------------------------|------------|--------------------------------------------|------------|
| Se05 <sup>ii</sup> —Pt02—Se04                | 83.29 (5)  | Pt02—Se05—Nb03 <sup>x</sup>                | 84.01 (5)  |
| Se05—Pt02—Se04                               | 96.71 (5)  | Pt01—Se05—Nb03 <sup>x</sup>                | 130.50 (4) |
| Se04 <sup>ii</sup> —Pt02—Se04                | 180.0      | Pt02—Se05—Nb03 <sup>xi</sup>               | 84.01 (5)  |
| Se06—Nb03—Se07                               | 81.35 (6)  | Pt01—Se05—Nb03 <sup>xi</sup>               | 130.50 (4) |
| Se06—Nb03—Se05 <sup>iii</sup>                | 83.05 (5)  | Nb03 <sup>x</sup> —Se05—Nb03 <sup>xi</sup> | 85.60 (6)  |
| Se07—Nb03—Se05 <sup>iii</sup>                | 134.21 (4) | Pt01—Se06—Pt01 <sup>vii</sup>              | 92.37 (6)  |
| Se06—Nb03—Se05 <sup>iv</sup>                 | 83.05 (5)  | Pt01—Se06—Nb03                             | 70.18 (4)  |
| Se07—Nb03—Se05 <sup>iv</sup>                 | 134.21 (4) | Pt01 <sup>vii</sup> —Se06—Nb03             | 70.18 (4)  |
| Se05 <sup>iii</sup> —Nb03—Se05 <sup>iv</sup> | 85.59 (6)  | Pt01 <sup>vii</sup> —Se07—Pt01             | 92.00 (6)  |
| Se06—Nb03—Se04 <sup>v</sup>                  | 135.44 (4) | Pt01 <sup>vii</sup> —Se07—Nb03             | 69.97 (4)  |
| Se07—Nb03—Se04 <sup>v</sup>                  | 85.66 (5)  | Pt01—Se07—Nb03                             | 69.97 (4)  |

Symmetry codes: (i)  $x, y, z+1$ ; (ii)  $-x+1, -y+1, -z+1$ ; (iii)  $x+1/2, -y+1/2, z$ ; (iv)  $x+1/2, -y+1/2, z-1$ ; (v)  $-x+3/2, y-1/2, -z$ ; (vi)  $-x+3/2, y-1/2, -z+1$ ; (vii)  $x, y, z-1$ ; (viii)  $-x+3/2, y+1/2, -z+1$ ; (ix)  $-x+3/2, y+1/2, -z$ ; (x)  $x-1/2, -y+1/2, z$ ; (xi)  $x-1/2, -y+1/2, z+1$ .

**Table S5.** EDS results of Pt<sub>3</sub>Nb<sub>2</sub>Se<sub>8</sub>.

| Element | Weight% | Atomic% |
|---------|---------|---------|
| Na K    | 0.21    | 0.96    |
| Se L    | 47.21   | 62.82   |
| Nb L    | 13.34   | 15.09   |
| Pt M    | 39.24   | 21.13   |
| Totals  | 100.00  | 100.00  |

**Table S6.** Performance comparison between Pt<sub>3</sub>Nb<sub>2</sub>Se<sub>8</sub> and NbSe<sub>2</sub>, PtSe<sub>2</sub> based catalysts at a current density of -10 mA cm<sup>-2</sup>.

| Catalysts                                           | Overpotential (mV) | Tafel slope (mV dec <sup>-1</sup> ) | Ref.                                                |
|-----------------------------------------------------|--------------------|-------------------------------------|-----------------------------------------------------|
| <b>Pt<sub>3</sub>Nb<sub>2</sub>Se<sub>8</sub></b>   | <b>44</b>          | <b>38.4</b>                         | <b>This work</b>                                    |
| Pt/C                                                | 45                 | 47                                  | <i>Adv. Mater.</i> <b>2020</b> , 1908521            |
| d-PtSe <sub>2</sub>                                 | 59                 | 88                                  | <i>Adv. Energy Mater.</i> <b>2022</b> , 12, 2102359 |
| PtSe <sub>2</sub> (76 nm)                           | 327                | 47                                  | <i>Nano Energy</i> <b>2017</b> , 42, 26–33          |
| PtSe <sub>2</sub> /Pt                               | 42                 | 53                                  | <i>Angew.Chem.Int.Ed.</i> <b>2021</b> ,60,23388     |
| Mo <sub>0.5</sub> Nb <sub>0.5</sub> Se <sub>2</sub> | 140                | 46                                  | <i>ACS Nano</i> <b>2021</b> , 15, 5467–5477         |
| Nb <sub>0.7</sub> V <sub>0.3</sub> Se <sub>2</sub>  | 236                | 72                                  | <i>ACS Nano</i> <b>2022</b> , 16, 4278–4288         |
| PtSe <sub>2</sub> @CC                               | 177                | 67                                  | <i>J. Mater. Chem. C</i> <b>2021</b> , 9, 9524–9531 |
| 1ML 1T-PtSe <sub>2</sub> /Au <sub>2</sub>           | 210                | 33                                  | <i>ACS Nano</i> <b>2019</b> , 13, 8442–8451         |
| 20L-PtSe <sub>2</sub>                               | 60                 | 41                                  | <i>Angew.Chem.Int.Ed.</i> <b>2019</b> , 131, 7051   |
| RhSe <sub>2</sub>                                   | 81                 | 96                                  | <i>Adv. Mater.</i> <b>2021</b> , 33, 2007894        |

## Reference:

1. G. Sheldrick, *Acta Crystallogr., Sect. C.* 2015, **71**, 3-8.
2. P. E. Blöchl, *Phys. Rev. B.* 1994, **50**, 1953.
3. G. Kresse, Furthmüller, *J. Phys. Rev. B.* 1996, **54**, 11169-11186.
4. G. Kresse, Hafner, *J. Phys. Rev. B.* 1993, **47**, 558-559.
5. G. Kresse, Furthmüller, *J. Comput. Mater. Sci.* 1996, **6**, 15-50.
6. J. P. Perdew, K. Burke, *Phys. Rev. Lett.* 1996, **77**, 3865-3868.
